# Supplementary material
Source: PubMed Central journal article supplement (PMC3903241)
Supplement: 1322301111_pnas.201322301SI.pdf [file 1322301111_pnas.201322301SI.pdf]

# Supporting Information

Hadid et al. 10.1073/pnas.1322301111

## SI Text

The microsite dubbed Evolution Canyon (EC) in lower Nahal Oren, Mount Carmel, Israel (32°43'N/34°58'E), is a Plio-Pleistocene canyon. It is a natural laboratory of evolution in action, a model for studying biodiversity evolution, adaptation, and speciation across life (a full reference list is available at <http://evolution.haifa.ac.il>, Nevo list of "Evolution Canyon" publications). The EC rocks are Upper Cenomanian limestones; the regional climate is Mediterranean (1) (mean annual rainfall *ca.* 600 mm, potential evapotranspiration 1,700 mm, and mean August and January temperatures 28 °C and 13 °C, respectively) (2). The soil is terra rossa on both slopes with more organic material on the "European" north-facing slope (3) of the canyon. The EC runs in an east-west direction. The opposite slopes are separated by only 100 m at the bottom and 400 m at the top. They receive different insulation owing to their orientation and dips (4). The higher insulation is on the south-facing slope, or "African" slope (AS), which is a tropical, hot, xeric, open park-forest of evergreen *Ceratonia siliqua*–*Pistacia lentiscus*, with dominant savanna-like grasslands. The lower insulation is on the north-facing slope, or "European" slope (ES), which is a temperate, cool, mesic, shady, dense, Mediterranean maquis forest of evergreen *Quercus calliprinos* and deciduous *Pistacia palaestina* (5). The AS is generally richer in terrestrial species and genetic diversity than the ES, which is richer in species associated reproductively with water, and are, generally, less genetically diverse (1, 6).

## SI Materials and Methods

### Molecular Analysis. Isolation of genomic DNA and mtDNA sequencing.

We extracted DNA from tails or stools of the captured animals (permission no. 31933/2008 by the Israel Nature and Park Authority) by using DNeasy Tissue Kit (Qiagen) or DNAzol kit, following the manufacturer's instructions (Table S1). Before sequencing, we identified the longest possible mtDNA fragments in the *Acomys cahirinus* genome by means of the long-arm PCR (LA-PCR). The used templates were reported in GenBank (12S rRNA, HQ652130; NADH3+ tRNA, Arg+NADH4L+ NADH4-U83803; *Cyt b* EF187818; and D-loop, FJ415595). The LA-PCR was conducted in a 20- $\mu$ L reaction volume that contains 10  $\mu$ L ready-mix, 20 pM of each primer, and about 60 ng genome DNA. The PCR conditions were set as 94 °C for the first 5 min, followed by 35 cycles of 94 °C denaturation for 30s, 60 °C annealing for 60s, and 68 °C extension for 3 min. Following LA-PCR, the sequencing of the complete mtDNA molecule was done stepwise with each step represented by about 500- to 600-bp-long segments. The procedure resulted in 67 partly overlapping fragments, which were used to infer the complete sequence (Tables S2 and S9). Sequencing was performed on a 3100 DNA Analyzer (Applied Biosystems).

**Amplified fragment length polymorphism.** To unfold the amplified fragment length polymorphism (AFLP), the isolated genomic DNA was digested using the enzyme combination EcoRI and MseI, then ligated to double-stranded EcoRI (E-) and MseI (M-)

adaptors (7). The resulting fragments were preamplified with nonselective primers, where the ligated adaptors served as target sites for primer annealing. Eight selected primer combinations were used for AFLP amplification. The selected EcoRI (E-) primers were labeled with a fluorescent dye (6-Fam, Vic, Ned, and Pet). PCR reactions were carried out according to the original protocol (7). Amplification products were visualized by Sequencher 3130X (Applied Biosystems). Allele identification and genotyping were determined directly from the chromatographs using Genemapper software (Applied Biosystems). Amplification products were scored as discrete character states (presence/absence) and recorded as band frequencies (allele frequency).

### Bioinformatics Software and Statistical Analyses. mtDNA sequencing.

The complete mtDNA sequences obtained and *Cytb* sequences downloaded from GenBank (Table S6) were aligned by means of ClustalW (8), which is a part of the Mega4 (9) package. Statistically, the most fitting substitution models to data were identified in Hyphy (10) by using the Akaike Information Criterion (11). Maximum likelihood phylogram and chronogram were constructed by means of PhyML\_3 (12). SplitsTree software (13) was used for network analysis that is present in the form of spinning networks. Haplotype and nucleotide diversities, *Hd* and *Pi*, respectively, were estimated by means of the program DNAsp (14). The differences between haplotype frequencies of the pooled sample and pairwise comparisons of haplotype frequencies were tested by using binomial probabilities (15). RDP3 (16) was used to test for the presence of homologous recombinations in the sequences. The presence of negative or positive selection on the constructed neighbor-joining phylogenetic tree was done by means of the tests available in the Datamonkey softwares (17). The PARRIS likelihood test (18) was used for identifying sites with dN/ds >1, a synonymous rate variation. The integrative test for positive or negative selection was performed by the same software. Cohen's unweighted kappa (19) was used to measure concordance in a categorical setting. Median joining network was constructed by means of median joining network software ([www.fluxus-engineering.com/](http://www.fluxus-engineering.com/)).

**AFLP and mtDNA analyses as binary data.** The AFLP genetic data were tested for consistency by means of the AFLPsurv (20). Hickory (21) was used to estimate interslope distance ( $\Theta^I$  and  $\Theta^{II}$ ) and genetic diversity (*Hs*).  $\Theta^I$  corresponds directly to Wright's *FST*,  $\Theta^{II}$  that measuring divergence among contemporaneous populations is similar to Nei's *GST* (22), and *Hs* is defined as average panmictic heterozygosity. The credible intervals of these parameters were estimated by the setting of 5,000 cycles for burning and 100,000 cycles of Markov chain Monte Carlo. The interslope differences in polymorphic loci (*Pb*) and allelic richness (*P*) were estimated by the program *Alfpldiv* based on rarefaction-based correction for sample sizes (23). We also constructed a dendrogram based on AFLP data by means of SplitsTree version 4 (24). To indicate the interslope differential selection we used MatSAM (25).

1. Nevo E (1995) Asian, African and European biota meet at "Evolution Canyon", Israel: Local tests of global biodiversity and genetic diversity patterns. *Proc Biol Sci* 262:149–155.
2. Goldreich Y (2003) *The Climate of Israel: Observation, Research, and Application* (Springer, New York).
3. Nevo E, et al. (1998) Edaphic interslope and valley bottom differences at "Evolution Canyon", Lower Nahal Oren, Mount Carmel, Israel. *Catena* 33:241–254.
4. Pavlíček T, Sharon D, Kravchenko V, Saaroni H, Nevo E (2003) Microclimatic interslope differences underlying biodiversity contrasts in "Evolution Canyon", Mt. Carmel, Israel. *Isr J Earth Sci* 52:1–9.

5. Nevo E, Fragman O, Dafni A, Beiles A (1999) Biodiversity and interslope divergence of vascular plants caused by microclimatic differences at "Evolution Canyon", Lower Nahal Oren, Mount Carmel, Israel. *Isr J Plant Sci* 47(1):49–59.
6. Pavlíček T, Nevo E (2008) Local species richness distribution at "Evolution Canyon" microsite, Mt. Carmel, Israel. *Ecologia Mediterranea* 34:25–34.
7. Vos P, et al. (1995) AFLP: A new technique for DNA fingerprinting. *Nucleic Acids Res* 23(21):4407–4414.
8. Thompson JD, Gibson TJ, Higgins DG (2002) Multiple sequence alignment using ClustalW and ClustalX. *Current Protocols in Bioinformatics* (Wiley Online Library), 00:2.3.1–2.3.22.

9. Tamura K, Dudley J, Nei M, Kumar S (2007) MEGA4: Molecular evolutionary genetics analysis (MEGA) software version 4.0. *Mol Biol Evol* 24(8):1596–1599.
10. Pond SL, Frost SD, Muse SV (2005) HyPhy: Hypothesis testing using phylogenies. *Bioinformatics* 21(5):676–679.
11. Akaike H (1974) A new look at the statistical model identification. *IEEE Trans Automat Contr* 19:716–723.
12. Guindon S, Gascuel O (2003) A simple, fast, and accurate algorithm to estimate large phylogenies by maximum likelihood. *Syst Biol* 52(5):696–704.
13. Huson DH (1998) SplitsTree: Analyzing and visualizing evolutionary data. *Bioinformatics* 14(1):68–73.
14. Librado P, Rozas J (2009) DnaSP v5: A software for comprehensive analysis of DNA polymorphism data. *Bioinformatics* 25(11):1451–1452.
15. Lowry R (2011) *Binomial probabilities*. VassarStats: Website for Statistical Computations. Available at <http://vassarstats.net>.
16. Martin DP, et al. (2010) RDP3: A flexible and fast computer program for analyzing recombination. *Bioinformatics* 26(19):2462–2463.
17. Delport W, Poon AFY, Frost SDW, Kosakovsky Pond SL (2010) Datamonkey 2010: A suite of phylogenetic analysis tools for evolutionary biology. *Bioinformatics* 26(19):2455–2457.
18. Scheffler K, Martin DP, Seoighe C (2006) Robust inference of positive selection from recombining coding sequences. *Bioinformatics* 22(20):2493–2499.
19. Lowry R (2011) *Kappa as a measure concordance in categorical sorting*. Available at <http://faculty.vassar.edu/lowry/VassarStats.html>.
20. Vekemans X (2002) *Aflp-surv 1.0. A Program for Genetic Analysis with AFLP (and RAPD) Population Data* (Laboratoire de Génétique et d'Ecologie Végétales, Université Libre de Bruxelles, Brussels).
21. Holsinger KE, Lewis PO (2007) *Hickory: A Package for Analysis of Population Genetic Data* (Department of Ecology and Evolutionary Biology, University of Connecticut, Storrs, CT).
22. Holsinger KE (1999) Analysis of genetic diversity in geographically structured populations: A Bayesian perspective. *Hereditas* 130:245–255.
23. Coart E, Van Glabeke S, Petit RJ, Van Bockstaele E, Roldán-Ruiz I (2005) Range wide versus local patterns of genetic diversity in hornbeam (*Carpinus betulus L.*). *Conserv Genet* 6:259–273.
24. Huson DH, Bryant D (2008) *User Manual for SplitsTree4 V4. 10* (Image, Rochester, NY), pp 1–57.
25. Joost S, Kalbermatten M, Bonin A (2008) Spatial analysis method (sam): A software tool combining molecular and environmental data to identify candidate loci for selection. *Mol Ecol Resour* 8(5):957–960.
26. Schluter PM, Harris S (2006) Analysis of multilocus fingerprinting data sets containing missing data. *Mol Ecol Notes* 6:569–572.

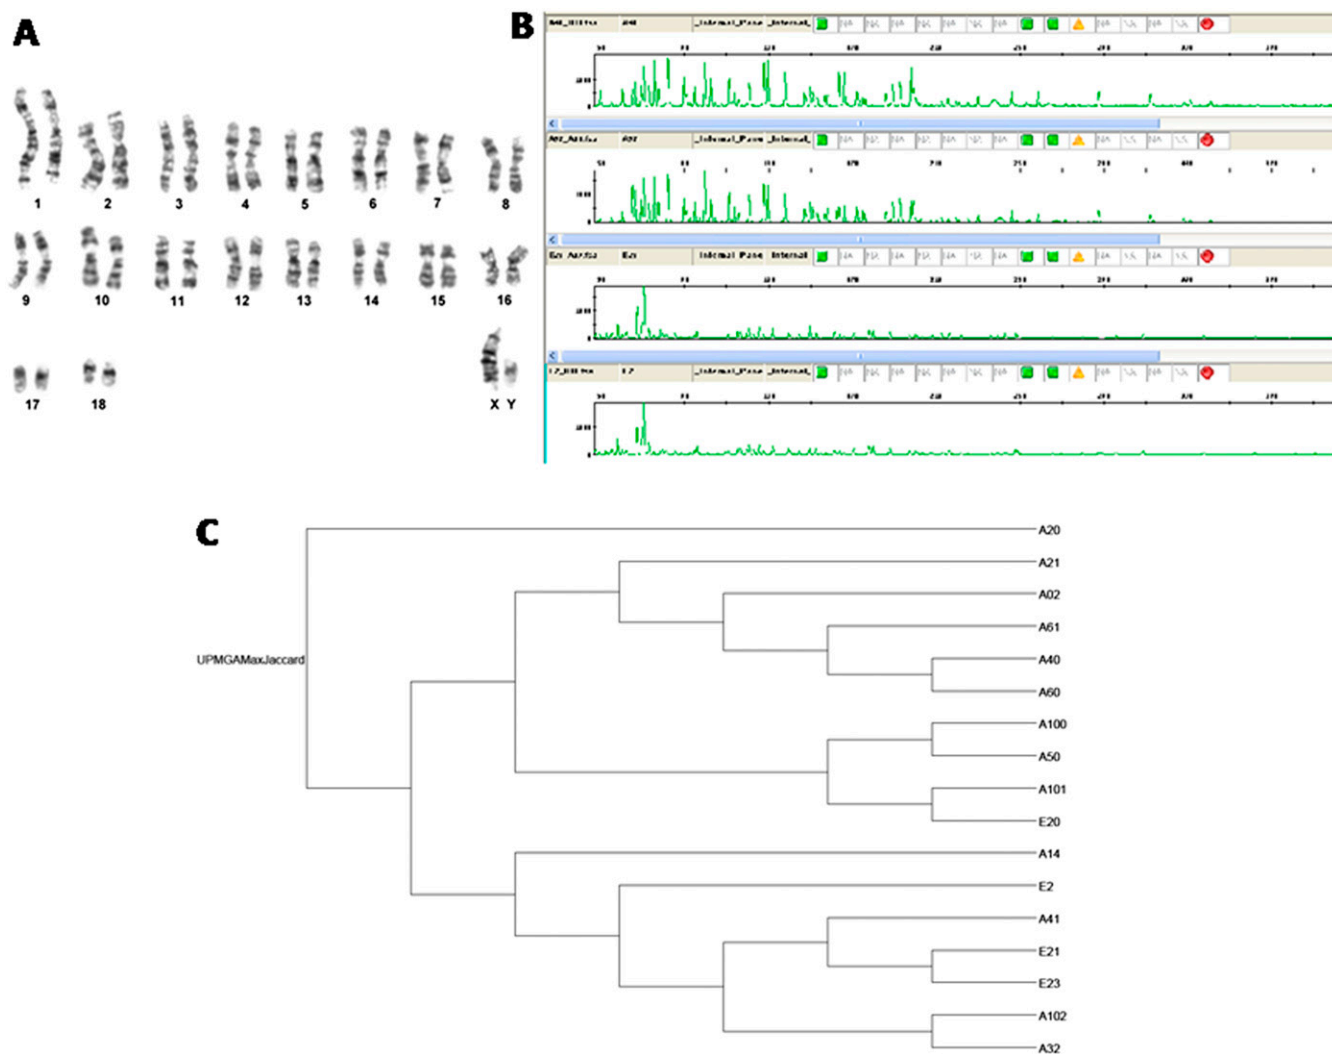

**Fig. S1.** (A) G-banded karyotype of a male *Acomys* from the south-facing slope of Nahal Oren:  $2n = 38$ , Number of fragments (NF) = 70. All 34 karyotyped animals in both slopes had the same structure (G, C, and AgNOR banding) of karyotype based on 34 karyotypes at EC. (B) An example of AFLP profile of two animals representing each slope. Two upper profiles represent AS animals (A41 and A52) and the two lower profiles represent the ES animals (E23 and E2). (C) AFLP-based neighbor joining dendrogram of *A. cahirinus* samples from EC made by FAMD (26). A, "African" slope (AS); E, "European" slope (ES).



**Table S2. Identification of mtDNA sequences and their basic parameters**

| mtDNA sequence | Position    | Base pairs | No. of variable sites |
|----------------|-------------|------------|-----------------------|
| tRNA-Phe       | 1–67        | 67         |                       |
| 12SrRNA        | 68–1013     | 946        | 2                     |
| tRNA-Val       | 1014–1080   | 67         |                       |
| 16SrRNA        | 1081–2640   | 1,560      | 2                     |
| tRNA-Leu(UUR)  | 2641–2715   | 75         |                       |
| <i>NADH1</i>   | 2716–3672   | 957        | 4                     |
| tRNA-Ile       | 3671–3739   | 69         | 1                     |
| tRNA-Gln       | 3737–3807   | 71         |                       |
| tRNA-Met       | 3812–3880   | 69         |                       |
| <i>NADH2</i>   | 3881–4922   | 1,042      | 2                     |
| tRNA-Trp       | 4918–4982   | 65         |                       |
| tRNA-Ala       | 4986–5054   | 69         |                       |
| tRNA-Asn       | 5057–5127   | 71         | 1                     |
| tRNA-Ile       | 5128–5158   | 31         |                       |
| tRNA-Cys       | 5159–5219   | 61         |                       |
| tRNA-Tyr       | 5227–5292   | 66         |                       |
| <i>COI</i>     | 5294–6838   | 1,545      | 3                     |
| tRNA-Ser(UCN)  | 6836–6804   | 69         |                       |
| tRNA-Asp       | 6908–6975   | 68         |                       |
| <i>COII</i>    | 6977–7660   | 684        | 1                     |
| tRNA-Lys       | 7664–7726   | 63         |                       |
| <i>ATP8</i>    | 7728–7931   | 204        | 1                     |
| <i>ATP6</i>    | 7889–8569   | 681        | 3                     |
| <i>COIII</i>   | 8569–9352   | 784        | 1                     |
| tRNA-Gly       | 9353–9420   | 68         |                       |
| <i>NADH3</i>   | 9421–9768   | 348        |                       |
| tRNA-Arg       | 9771–9837   | 67         |                       |
| <i>NADH4L</i>  | 9838–10134  | 297        | 1                     |
| <i>NADH4</i>   | 10128–11499 | 1,372      | 6                     |
| tRNA-His       | 11500–11569 | 70         |                       |
| tRNA-Ser(AGY)  | 11570–11626 | 57         | 1                     |
| tRNA-Leu(CUN)  | 11627–11697 | 71         |                       |
| <i>NADH5</i>   | 11698–13530 | 1,833      | 3                     |
| <i>NADH6</i>   | 13509–14029 | 521        | 1                     |
| tRNA-Glu       | 14030–14102 | 73         | 1                     |
| <i>cytb</i>    | 14103–15243 | 1,141      | 5                     |
| tRNA-Thr       | 15244–15311 | 68         |                       |
| tRNA-Pro       | 15312–15379 | 68         |                       |
| D-loop         | 15380–16218 | 839        | 5                     |

**Table S3. Identified haplotypes from complete mtDNA sequences of 17 *A. cahirinus* individuals in EC**

| Sample name | Sequence                                                                                                      | Haplotype |
|-------------|---------------------------------------------------------------------------------------------------------------|-----------|
| A32         | REF                                                                                                           | Y01       |
| E10         | REF                                                                                                           | Y01       |
| E14         | REF                                                                                                           | Y01       |
| E2          | REF                                                                                                           | Y01       |
| E21         | REF                                                                                                           | Y01       |
| E3          | REF                                                                                                           | Y01       |
| E8          | REF                                                                                                           | Y01       |
| E9          | 2837G2961T4069A5110C7808T8445A13388C14692C15013G15494G                                                        | Y02       |
| E22         | 1647C4848C5110C7808T8445A10228T11058G13388C14112C                                                             | Y03       |
| A01         | 350T1009A1822T2961T5110C7808T8364T9989C11785T13388C13915C14986G15385.1T                                       | Y04       |
| A101        | 350T1822T2961T3299A5110C6042A6262C6321G7808T8661G10587C11089C11122C11785T<br>13388C14168A15528G15538C16058.1C | Y05       |
| A102        | 350T1822T2961T3299A5110C6042A6262C6321G7808T8661G10587C11089C11122C11785T<br>13388C14168A15528G15538C16058.1C | Y05       |
| A15         | 350T1009A1822T2961T5110C7808T8364T11785T13388C14112C14986G15385.1T                                            | Y06       |
| A20         | 3014A7808T8496G10586A11584G12290A                                                                             | Y07       |
| A33         | 350T1009A1822T2961T3691A5110C7323A7808T11785T13388C14100C14986G                                               | Y08       |
| A51         | 1647C2961T4848C5110C7808T8445A10228T11058G13388C14112C                                                        | Y09       |
| A52         | 350T1009A1822T5110C7808T8364T9989C11785T13388C13915C14986G15385.1T                                            | Y10       |

We defined our reference (REF) as ES dominant haplotype Y1 and A32.

**Table S4. Identified genetic variability at 17 complete mtDNA sequences of *A. cahirinus* at EC**

| Position/animals       | E08* | A102 | A15 | A20 | A01 | A101 | E22 | E09 | A52 | A51 | A33 | No. of variable sites |  | Type |
|------------------------|------|------|-----|-----|-----|------|-----|-----|-----|-----|-----|-----------------------|--|------|
|                        |      |      |     |     |     |      |     |     |     |     |     |                       |  |      |
| 350                    | C    | T    | T   |     | T   | T    |     |     | T   |     | T   | 6                     |  | rRNA |
| 1,009                  | G    |      | A   |     | A   |      |     |     | A   |     | A   | 4                     |  | rRNA |
| 1,647                  | T    |      |     |     |     |      | C   |     |     | C   |     | 2                     |  | rRNA |
| 1,822                  | C    | T    | T   |     | T   | T    |     |     | T   |     | T   | 6                     |  | rRNA |
| 2,837                  | A    |      |     |     |     |      |     | G   |     |     |     | 1                     |  |      |
| 2,961                  | C    | T    | T   |     | T   | T    |     | T   |     | T   | T   | 7                     |  | Ns.  |
| 3,014                  | G    |      |     | A   |     |      |     |     |     |     |     | 1                     |  |      |
| 3,299                  | G    | A    |     |     |     | A    |     |     |     |     |     | 2                     |  |      |
| 3,691                  | G    |      |     |     |     |      |     |     |     |     | A   | 1                     |  |      |
| 4,069                  | G    |      |     |     |     |      |     | A   |     |     |     | 1                     |  | Ns.  |
| 4,848                  | T    |      |     |     |     |      | C   |     |     | C   |     | 2                     |  |      |
| 5,110                  | A    | C    | C   |     | C   | C    | C   | C   | C   | C   | C   | 9                     |  | tRNA |
| 6,042                  | G    | A    |     |     |     | A    |     |     |     |     |     | 2                     |  |      |
| 6,262                  | T    | C    |     |     |     | C    |     |     |     |     |     | 2                     |  |      |
| 6,321                  | A    | G    |     |     |     | G    |     |     |     |     |     | 2                     |  |      |
| 7,323                  | C    |      |     |     |     |      |     |     |     |     | A   | 1                     |  |      |
| 7,808                  | C    | T    | T   | T   | T   | T    | T   | T   | T   | T   | T   | 10                    |  | Ns.  |
| 8,364                  | C    |      | T   |     | T   |      |     |     | T   |     |     | 3                     |  |      |
| 8,445                  | G    |      |     |     |     |      | A   | A   |     | A   |     | 3                     |  |      |
| 8,496                  | A    |      |     | G   |     |      |     |     |     |     |     | 1                     |  |      |
| 8,661                  | A    | G    |     |     |     | G    |     |     |     |     |     | 2                     |  | Ns.  |
| 9,989                  | T    |      |     |     | C   |      |     |     | C   |     |     | 2                     |  | Ns.  |
| 10,228                 | C    |      |     |     |     |      | T   |     |     | T   |     | 2                     |  |      |
| 10,586                 | G    |      |     | A   |     |      |     |     |     |     |     | 1                     |  | Ns.  |
| 10,587                 | T    | C    |     |     |     | C    |     |     |     |     |     | 2                     |  | Ns.  |
| 11,058                 | C    |      |     |     |     |      | G   |     |     | G   |     | 2                     |  | Ns.  |
| 11,089                 | T    | C    |     |     |     | C    |     |     |     |     |     | 2                     |  |      |
| 11,122                 | T    | C    |     |     |     | C    |     |     |     |     |     | 2                     |  |      |
| 11,584                 | A    |      |     | G   |     |      |     |     |     |     |     | 1                     |  |      |
| 11,785                 | C    | T    | T   |     | T   | T    |     |     | T   |     | T   | 6                     |  | Ns.  |
| 12,290                 | G    |      |     | A   |     |      |     |     |     |     |     | 1                     |  |      |
| 13,388                 | T    | C    | C   |     | C   | C    | C   | C   | C   | C   | C   | 9                     |  |      |
| 13,915                 | T    |      |     |     | C   |      |     |     | C   |     |     | 2                     |  |      |
| 14,100                 | T    |      |     |     |     |      |     |     |     |     | C   | 1                     |  |      |
| 14,112                 | T    |      | C   |     |     |      | C   |     |     | C   |     | 3                     |  | Ns.  |
| 14,168                 | G    | A    |     |     |     | A    |     |     |     |     |     | 2                     |  | Ns.  |
| 14,692                 | T    |      |     |     |     |      |     | C   |     |     |     | 1                     |  |      |
| 14,986                 | A    |      | G   |     | G   |      |     |     | G   |     | G   | 4                     |  |      |
| 15,013                 | A    |      |     |     |     |      |     | G   |     |     |     | 1                     |  |      |
| 15,385.10 <sup>†</sup> |      |      | T   |     | T   |      |     |     | T   |     |     | 3                     |  |      |
| 15,494                 | A    |      |     |     |     |      |     | G   |     |     |     | 1                     |  |      |
| 15,528                 | A    | G    |     |     |     | G    |     |     |     |     |     | 2                     |  |      |
| 15,538                 | T    | C    |     |     |     | C    |     |     |     |     |     | 2                     |  |      |
| 16,058.10 <sup>†</sup> |      | C    |     |     |     | C    |     |     |     |     |     | 2                     |  |      |
| Total differences      |      | 19   | 12  | 6   | 13  | 19   | 9   | 10  | 12  | 10  | 12  |                       |  |      |

Blanks correspond to the same nucleotide as the reference. Ns correspond to Nonsynonymous mutation. Letters correspond to DNA base pairs (T, thymine; G, guanine; C, cytosine; and A, adenine).

\*E08, E14, A32, E02, E10, E21, and E03.

<sup>†</sup>.1=insertion.

**Table S5. Genetic variability estimated from complete mtDNA sequences in *A. cahirinus* at "EC"**

| Sites | M  | S  | h  | Hd                       | π        |
|-------|----|----|----|--------------------------|----------|
| EC    | 17 | 42 | 10 | 0.838 ± 0.087 (P = 0.04) | 0.000648 |
| AS    | 9  | 37 | 8  | 0.972 ± 0.065 (P = 0.04) | 0.0008   |
| ES    | 8  | 15 | 3  | 0.464 ± 0.2 (P = 0.01)   | 0.000275 |

h, number of haplotypes; Hd, haplotype diversity; M, number of samples; S, number of variable sites; π, nucleotide diversity.

**Table S6. Downloaded *Cytb* sequences of nine different *Acomys* species from GenBank**

| Species              | Location           | Accession no. |
|----------------------|--------------------|---------------|
| <i>A. cahirinus</i>  | Cairo, Egypt       | Z96051        |
| <i>A. cahirinus</i>  | Cairo, Egypt       | AJ233953      |
| <i>A. dimidiatus</i> | South Sinai, Egypt | AJ2339595     |
| <i>A. dimidiatus</i> | Mount Sinai, Egypt | Z96060        |
| <i>A. dimidiatus</i> | Dead Sea           | AJ233953      |
| <i>A. dimidiatus</i> | Saudi Arabia       | Z96061        |
| <i>A. dimidiatus</i> | Saudi Arabia       | Z96062        |
| <i>A. ignitus</i>    | Tanzania           | JN247674      |
| <i>A. airensis</i>   | Egypt              | AJ012021      |
| <i>A. percivali</i>  | Tanzania           | EF187818      |
| <i>A. wilsoni</i>    | Tanzania           | EF187801      |
| <i>A. minos</i>      | Greece             | AJ233961      |
| <i>A. cilicicus</i>  | Turkey             | AJ233957      |
| <i>A. nesiotus</i>   | Cyprus             | AJ233952      |

**Table S7. European female mate choice**

| No. of experiment | No. of the European male | No. of the African male | No. of visits to European male | No. of visits to African male |
|-------------------|--------------------------|-------------------------|--------------------------------|-------------------------------|
| 1                 | 2                        | 1                       | 12                             | 9                             |
| 2                 | 4                        | 3                       | 4                              | 3                             |
| 3                 | 6                        | 5                       | 7                              | 6                             |
| 4                 | 8                        | 7                       | 6                              | 2                             |
| 5                 | 2                        | 9                       | 3                              | 2                             |
| 6                 | 11                       | 10                      | 18                             | 14                            |

Estral European female no. 7 choosing between 11 alternative "African" and "European" males in six experiments.

**Table S8. Capture–recapture data of *Acomys* in Evolution Canyon for the period from March 1996 to April 1999**

| Observation                                           | Both slopes | South-facing slope |
|-------------------------------------------------------|-------------|--------------------|
| Marked <i>Acomys</i> 1996–1999                        | 460         | 394                |
| Total recapture cases                                 | 418         |                    |
| Two recapture cases                                   | 60          |                    |
| Three recapture cases                                 | 41          |                    |
| Four recapture cases                                  | 16          |                    |
| Five recapture cases                                  | 11          |                    |
| Six recapture cases                                   | 6           |                    |
| Seven recapture cases                                 | 3           |                    |
| Eight recapture cases                                 | 5           |                    |
| Nine recapture cases                                  | 3           |                    |
| Ten recapture cases                                   | 4           |                    |
| Eleven recapture cases                                | 5           |                    |
| Twelve recapture cases                                | 1           |                    |
| Thirteen recapture cases                              | 3           |                    |
| Fourteen recapture cases                              | 3           |                    |
| No. of cases of <i>Acomys</i> slope-to-slope movement | 5           |                    |

The number of traps in a month on average was 178. Studied by Elena Ivanitskaya and David Uekin.

**Table S9. List of primers used for complete mtDNA sequencing in *A. cahirinus***

| Primer name | mtDNA region name | Position    | Primer sequence            |
|-------------|-------------------|-------------|----------------------------|
| LA4F        | 12S rRNA          | 315–335     | ACCGCGGTACATACGATTAAC      |
| LA1F        | 12S rRNA          | 683–702     | TTCAGCAAACCCCTCAAAGG       |
| LA3R        | 12S rRNA          | 744–763     | CACCTCATGGGCTACACCTT       |
| LA33F       | 12S rRNA          | 860–885     | GCTTAATTGAATAGAGCAATGAAGTG |
| LA44F       | 12S rRNA          | 898–917     | CCGTCACCCCTCCTCAAACCTA     |
| LA38F       | tRNA-Val          | 1039–1058   | TGGCCTACACCCAGAAAGACT      |
| LA25R       | tRNA-Val          | 1075–1094   | GGGCTGTTTTGGTTCAAAG        |
| LA48        | 16S rRNA          | 1402–1421   | GAAATGCCTAACGAGCTTGG       |
| LA39        | 16S rRNA          | 1559–1578   | GTCAAACCCCAAGGACAGA        |
| LA40        | 16S rRNA          | 1950–1969   | ACTGCCTGCCAGTGACTAA        |
| LA9F        | 16rRNA            | 2320–2340   | TGATCAACGGACCAAGTTACC      |
| LA41        | 16rRNA            | 2344–2363   | GGGATAACAGCGCAATCCTA       |
| LA42        | 16rRNA            | 2562–2581   | CCTTTCATTAAGCGCTTTC        |
| LA33R       | 16rRNA            | 2590–2613   | CATTGTGAAATTGAGATTTTTTCAT  |
| LA49        | NADH 1            | 2807–2826   | TGGGACCTTTTCGTAGTTGC       |
| LA14F       | NADH 1            | 2991–3010   | CACCCCTAGCCAACATAAAA       |
| LA43        | NADH 1            | 3367–3386   | GCCCCTTGCCTTATTCTTC        |
| LA16F       | tRNA-Gln          | 3739–3759   | GGACAACAGGAATTGAACCTG      |
| LA19F       | NADH 2            | 4200–4219   | CCTAGCACCTTCCACACAT        |
| LA18F       | NADH 2            | 4430–4449   | TCGCCACATAGGATGAATA        |
| LA20F       | NADH 2            | 4884–4905   | AATTCTCCCTTAACACCCCTA      |
| LA21F       | COX I             | 5416–5435   | GGACAACCAGGGGCTCTATT       |
| LA12F       | COX I             | 5912–5932   | TGCGGTGGTTAATAATATGG       |
| LA8F        | COX I             | 5919–5938   | TTAGGTTGGGGTGGTTAAT        |
| LA29F       | COX I             | 6026–6045   | TCCTGATTCTCCCTGGGTTT       |
| LA34F       | COX I             | 6351–6371   | AACCGGAATTGACTGTCAAA       |
| LA30        | COX I             | 6440–6459   | TGGGGGCTGTATTTGCTATC       |
| LA44R       | COX I             | 6627–6649   | CCATGTTTCAAGTTGTGTAAGCA    |
| LA35F       | COX I             | 6802–6821   | ACCTTCGAAGAACCCACCTA       |
| LA31        | COX II            | 7273–7292   | ATGGGCCACCAATGATACTG       |
| LA6R        | COX II            | 7558–7578   | GCCACAAATTTCTGAGCATTG      |
| LA46        | ATPase 6          | 8163–8182   | CACGCCTACCACCAACTAT        |
| LA32        | ATPase 6          | 8337–8355   | TATCCAACCCATGGCCCTA        |
| LA36F       | ATPase 6          | 8915–8934   | ACCACCTGCAGGAATCTCAC       |
| LA44        | COX III           | 9006–9025   | GCCCACCATAGCCTCATAGA       |
| LA36R       | COX III           | 9133–9152   | TGAGCCATAGATGCCATCAG       |
| LA45        | COX III           | 9254–9273   | AAAACACCCTTTGGCTTCG        |
| LA2F        | NADH 3            | 9423–9442   | AACATACTCCTGGCCGTAC        |
| LA12R       | NADH 3            | 9451–9747   | TAATTAGGAGAAGTGACAGGGTGA   |
| LA22F       | NADH 4            | 9519–9538   | GCAAACCCCTATGAATGTGG       |
| LA26F       | NADH 4            | 10148–10169 | TCAACCATACTTCTCCCCCTAA     |
| LA1R        | NADH 4            | 10354–10373 | TATGGTTTTGGCTGGCTAGG       |
| LA2AF       | NADH 4            | 10531–10550 | GGGCAATCAAACAGAACGAT       |
| LA5R        | NADH 4            | 10684–10706 | GGATGTTGTTTATGATGTTGTG     |
| LA22R       | NADH 4            | 10784–10803 | CCTGCGATTGGAGCTTCTAC       |
| LA7R        | NADH 4            | 10784–10803 | CCTGCGATTGGAGCTTCTAC       |
| LA8R        | NADH 4            | 11280–11299 | TGATGGGTTGGATCAAGAGA       |
| LA10F       | tRNA-Ser          | 11567–11589 | CCAAGAAAGAATACAAGGACTGC    |
| LA23F       | NADH 5            | 12282–12301 | TGGGAAATGCAACAAATCCT       |
| LA13F       | NADH 5            | 12358–12377 | GAAAAATCCGCTCAATTTGGA      |
| LA15F       | NADH 5            | 12795–12814 | TTCACCACCTCCTGCCTAAC       |
| LA47        | NADH 5            | 13217–13236 | CTCAAACCTAACCCCAACA        |
| LA17F       | NADH 5            | 13418–13438 | GCACATCTCAATCAAAAAGG       |
| LA27F       | NADH 6            | 13841–13867 | ATACCTCCCAATAAATTAGAAACACC |
| LA13R       | tRNA-Glu          | 14031–14055 | GCCATAGTTAAGTGTATGTAGGAA   |
| LA24F       | cyt b             | 14114–14133 | CGAAAAACACACCCACTCCT       |
| LA2AR       | cyt b             | 14114–14133 | AGGAGTGGGTGTGTTTTTCG       |
| LA3F        | cyt b             | 14114–14133 | CGAAAAACACACCCACTCCT       |
| LA10R       | cyt b             | 14389–14408 | AGATGCCTCGTCTTACGTGT       |
| LA37F       | cyt b             | 14588–14608 | TGAATTTGAGGTGGGTTTTCA      |
| LA28F       | cyt b             | 14697–14716 | TCCTTCACGAAACTGGCTCT       |
| LA3AF       | cyt b             | 15126–15145 | CCGTAGAACACCCCTTCATC       |



**Table S9. Cont.**

| Primer name | mtDNA<br>region name | Position    | Primer sequence          |
|-------------|----------------------|-------------|--------------------------|
| dac-loop F  | D-loop               | 15391–15414 | CATAAAATTATCTACCACCCACAA |
| LA25F       | D-loop               | 15788–15807 | GCCCATACGTTCCCCTTAAA     |
| dac-loop R  | D-loop               | 15968–15989 | GAGGAAGTTGTAATGGGGTA     |
| LA3AR       | 12S rRNA             | 16155–16178 | TGAAATGAGGGGTAAGATATGG   |
